# Supplementary material for: Identification of functional regulatory elements in the human genome using pooled CRISPR screens
Source: PubMed Central journal article supplement (PMC6995077; doi:10.1186/s12864-020-6497-0), 2020-01-31

Supplemental Figure S5

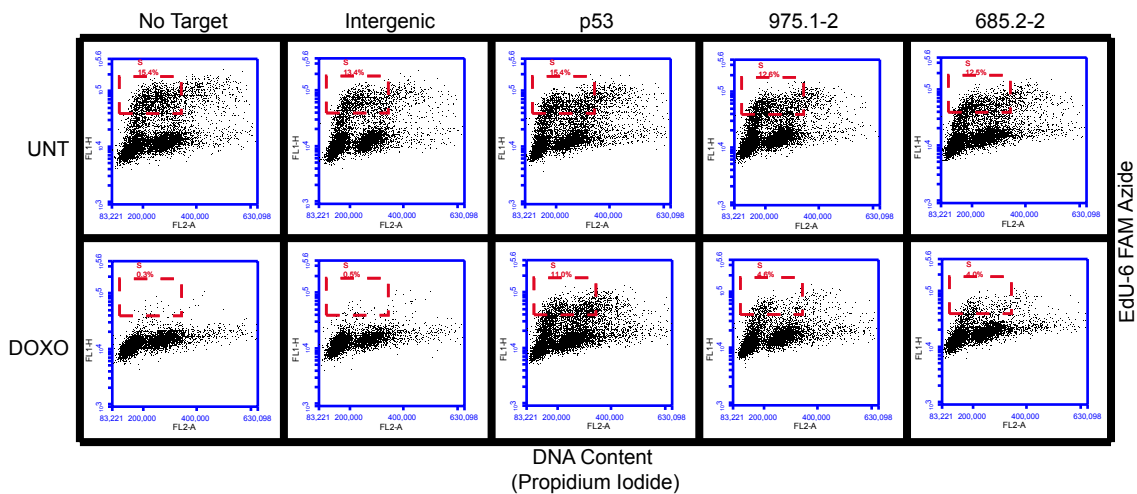

Supplement: 12864_2020_6497_MOESM5_ESM.pdf [file 12864_2020_6497_MOESM5_ESM.pdf]
